# Supplementary material for: Asymmetric carrier transport and weak localization in few layer graphene grown directly on a dielectric substrate
Source: Royal Society of Chemistry journal article supplement (doi:10.1039/d1cp03225a), 2021-01-01
Supplement: d1cp03225a1.pdf [file d1cp03225a1.pdf]

## **Supplementary Information**

# **Asymmetric carrier transport and weak localization in few layer graphene grown directly on dielectric substrate**

Muhammad Sabbtain Abbas<sup>1,4</sup>, Pawan Kumar Srivastava<sup>2</sup>, Yasir Hassan<sup>3</sup> and Changgu Lee<sup>2,3\*</sup>

<sup>1</sup> Department of Physics, Sungkyunkwan University, Suwon 16419, South Korea.

<sup>2</sup> School of Mechanical Engineering, Sungkyunkwan University, Suwon 16419, South Korea.

<sup>3</sup> SKKU Advanced Institute of Nanotechnology (SAINT), Sungkyunkwan University, Suwon 16419, South Korea.

<sup>4</sup> Centre for Advanced Studies in Physics (CASP), Government College University Lahore, 54000, Pakistan.

\*Corresponding author (peterlee@skku.edu)

## Growth Mechanism and Growth Conditions:

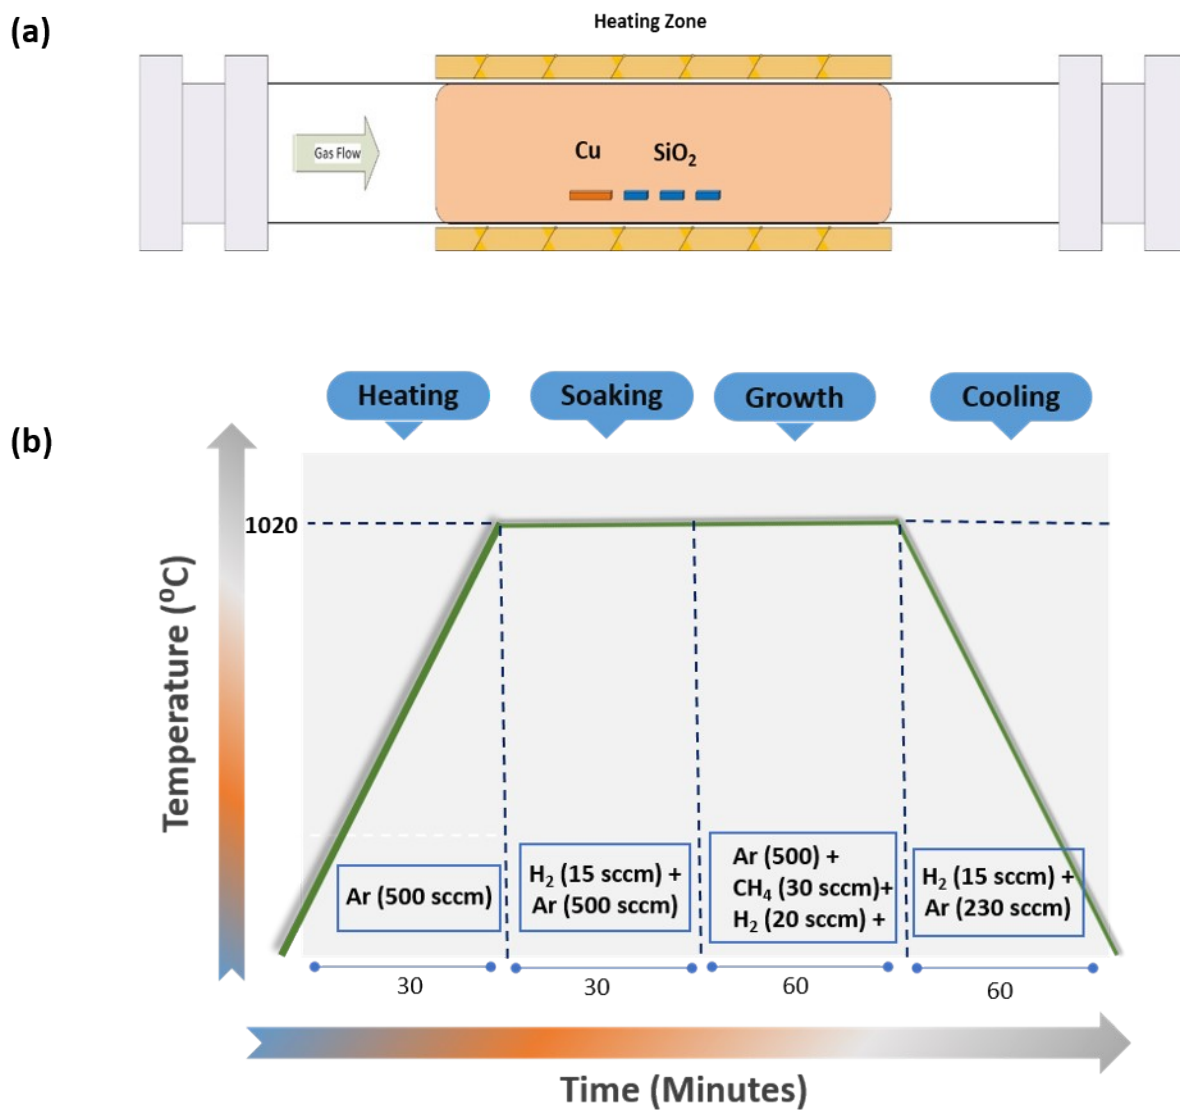

**Figure S1. Synthesis Process of direct growth of graphene on SiO<sub>2</sub>.** (a) Schematic of the CVD system and placement of Copper foil relative to the SiO<sub>2</sub> substrate. (b) Schematic of the growth process with growth conditions.

## Surface morphology of direct grown graphene:

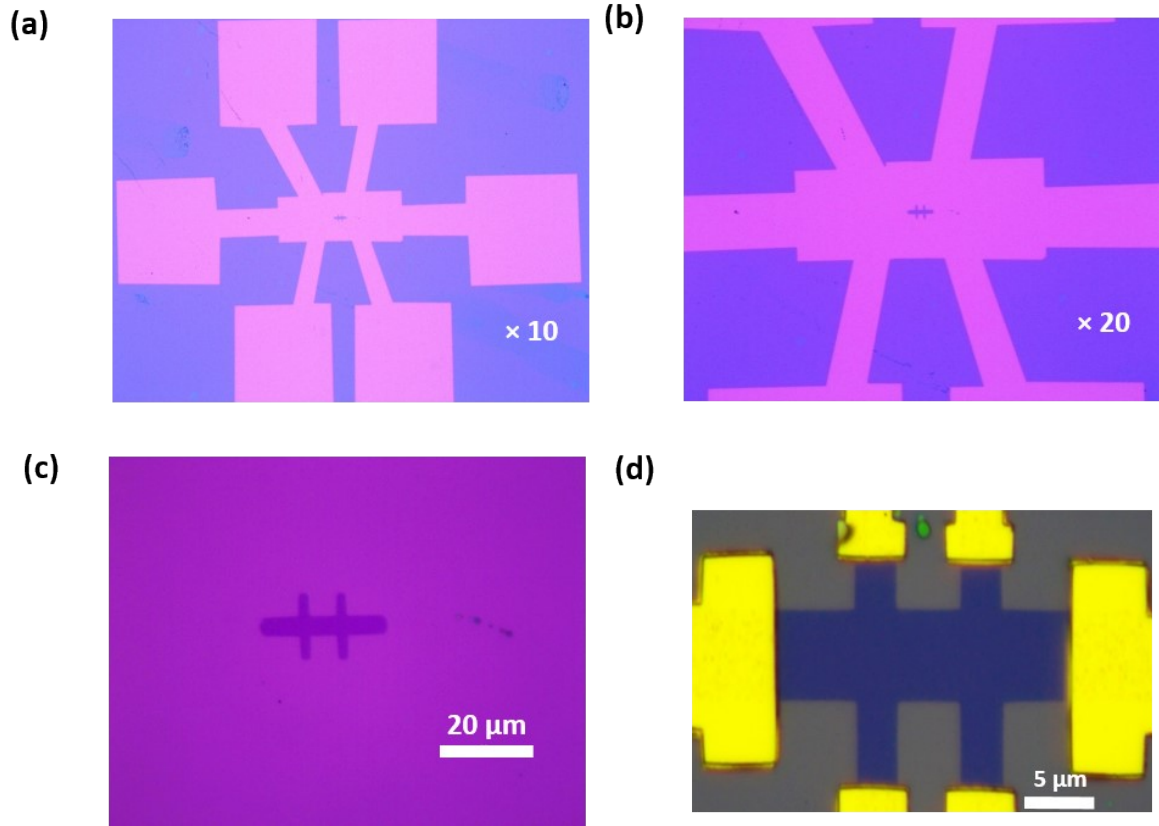

**Figure S2. Surface Morphology of the direct grown graphene on  $\text{SiO}_2$ .** (a,b & c) are the optical images of the device preparation process with channel area and the  $\text{O}_2$  plasma etched area for contact electrodes. (d) is the optical image of the actual channel area with contact electrodes in Hall bar configuration.

## Quantification of Defects:

For the quantification of defects in graphene devices, defect density  $n_D$  and average distance between defects  $L_D$  can be estimated from following relations.

$$L_D^2 = (1.8 \pm 0.5) \times 10^{-9} \lambda_L^4 \left(\frac{I_D}{I_G}\right)^{-1} \dots\dots\dots 1$$

$$n_D^2 (cm^{-2}) = \frac{(1.8 \pm 0.5) \times 10^{22}}{\lambda_L^4} \left(\frac{I_D}{I_G}\right) \dots\dots\dots 2$$

or

$$n_D (cm^{-2}) = \frac{10^{14}}{\pi L_D^2} \dots\dots\dots 3$$

Where  $\lambda_L$  is the excitation laser wavelength in nm (532 nm) and  $\left(\frac{I_D}{I_G}\right)$  is the Raman D and G intensity ratio (0.6).
